# Supplementary material
Source: PubMed Central journal article supplement (PMC3111761)
Supplement: NIHMS286119-supplement-01.pdf [file NIHMS286119-supplement-01.pdf]

**Supplementary Table 1: Combined analysis of SNPs selected for validation of an association with more aggressive prostate cancer**

| SNP        | Chr   | Gene            | Controls (N=1267) | OR   | More Aggressive**<br>(N=729) |                        |
|------------|-------|-----------------|-------------------|------|------------------------------|------------------------|
|            |       |                 | MAF <sup>†</sup>  |      | 95% CI                       | <i>p</i> <sup>††</sup> |
| rs3774315  | 3q26  | <i>TNFSF10</i>  | 0.25              | 1.22 | 1.05 - 1.41                  | 4.3 x10 <sup>-3</sup>  |
| rs8015211  | 14q22 | <i>FBXO34</i>   | 0.33              | 1.23 | 1.07 - 1.41                  | 1.5 x10 <sup>-3</sup>  |
| rs12433615 | 14q22 |                 | 0.31              | 1.23 | 1.07 - 1.41                  | 1.5 x10 <sup>-3</sup>  |
| rs1188069  | 14q22 |                 | 0.20              | 1.22 | 1.04 - 1.43                  | 6.4 x10 <sup>-3</sup>  |
| rs2341883  | 14q22 |                 | 0.32              | 1.29 | 1.12 - 1.48                  | 1.5 x10 <sup>-4</sup>  |
| rs6497287  | 15q13 | <i>HERC2</i>    | 0.06              | 1.56 | 1.20 - 2.01                  | 4.0 x10 <sup>-4</sup>  |
| rs11150069 | 16q23 | <i>WWOX</i>     | 0.30              | 0.88 | 0.76 - 1.02                  | 4.0 x10 <sup>-2</sup>  |
| rs4628973  | 16q24 |                 | 0.30              | 0.86 | 0.74 - 0.99                  | 1.9 x10 <sup>-2</sup>  |
| rs225061   | Xp21  | <i>IL1RAPL1</i> | 0.22              | 0.79 | 0.62 - 0.99                  | 2.2 x10 <sup>-2</sup>  |

<sup>†</sup>Minor Allele Frequency; <sup>§</sup>Two-sided p-value; <sup>††</sup>One-sided p-value; <sup>\*\*</sup>All aggressive cases from the GWAS and replication stages.
